# Supplementary material for: Fabrication of a microcapsule extinguishing agent with a core–shell structure for lithium-ion battery fire safety
Source: Royal Society of Chemistry journal article supplement (doi:10.1039/d1ma00343g), 2021-01-01
Supplement: d1ma00343g1.pdf [file d1ma00343g1.pdf]

## Electronic Supporting Information

### **Fabrication of microcapsule extinguishing agent with core-shell structure for lithium-ions battery fire safety**

Weixin Zhang<sup>1‡</sup>, Lin Wu<sup>1‡</sup>, Jinqiao Du<sup>2</sup>, Jie Tian<sup>2</sup>, Yan Li<sup>2</sup>, Yuming Zhao<sup>2</sup>, Hao Wu<sup>3</sup>,

Yunhui Zhong<sup>3</sup>, Yuan-Cheng Cao<sup>\*1</sup>, Shijie Cheng<sup>1</sup>

<sup>1</sup>State Key Laboratory of Advanced Electromagnetic Engineering and Technology, School of Electrical and Electronic Engineering, Huazhong University of Science and Technology, Wuhan 430074, China;

<sup>2</sup>Shenzhen Power Supply Co. Ltd., Shenzhen 518001, China;

<sup>3</sup>Zhejiang Landun Electronic New Material Technology Co. Ltd., Hangzhou 311418, China.

\*Corresponding author: [yccao@hust.edu.cn](mailto:yccao@hust.edu.cn)(Y.-C. Cao)

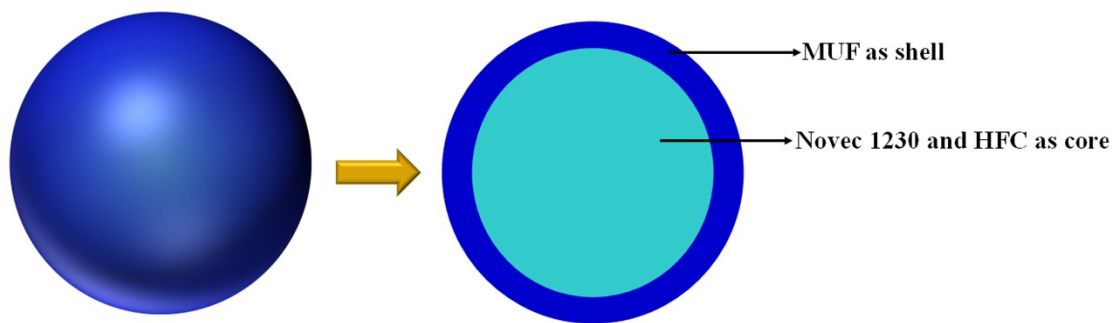

**Fig. S1** Microencapsulated fire extinguishing agent as core-shell structure.

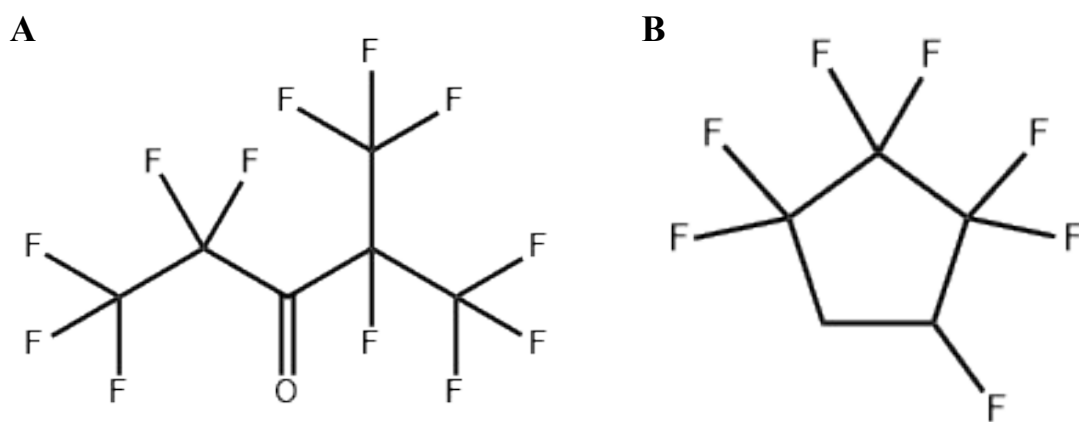

**Fig. S2** Molecular formula of (A)Novec1230. (B)HFC.

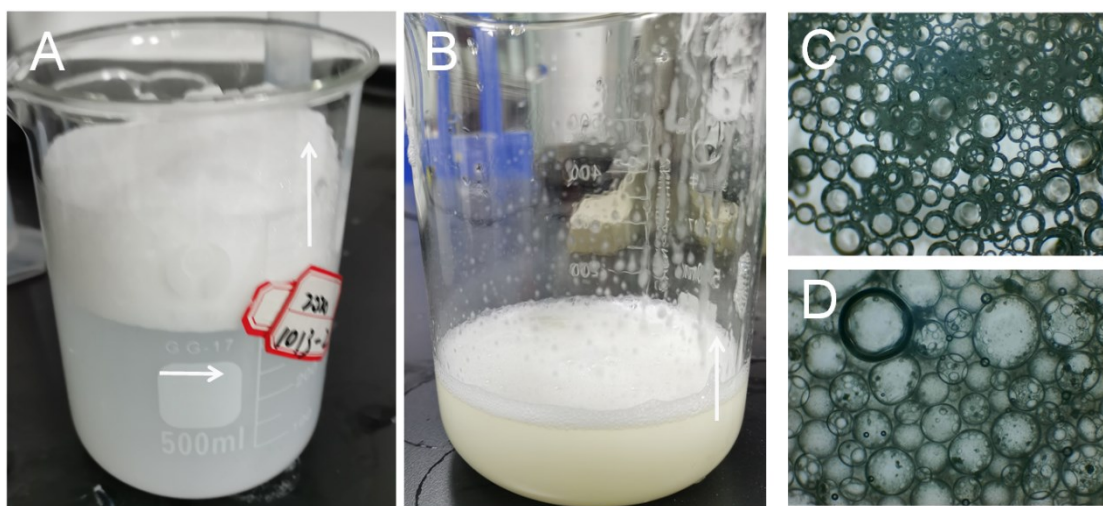

**Fig. S3** Photograph of MUF microcapsule solution. (A) without antifoaming agents. (B) with octanol as antifoaming agent and optical microscopy of (C) foam. (D) emulsion in microcapsule solution.

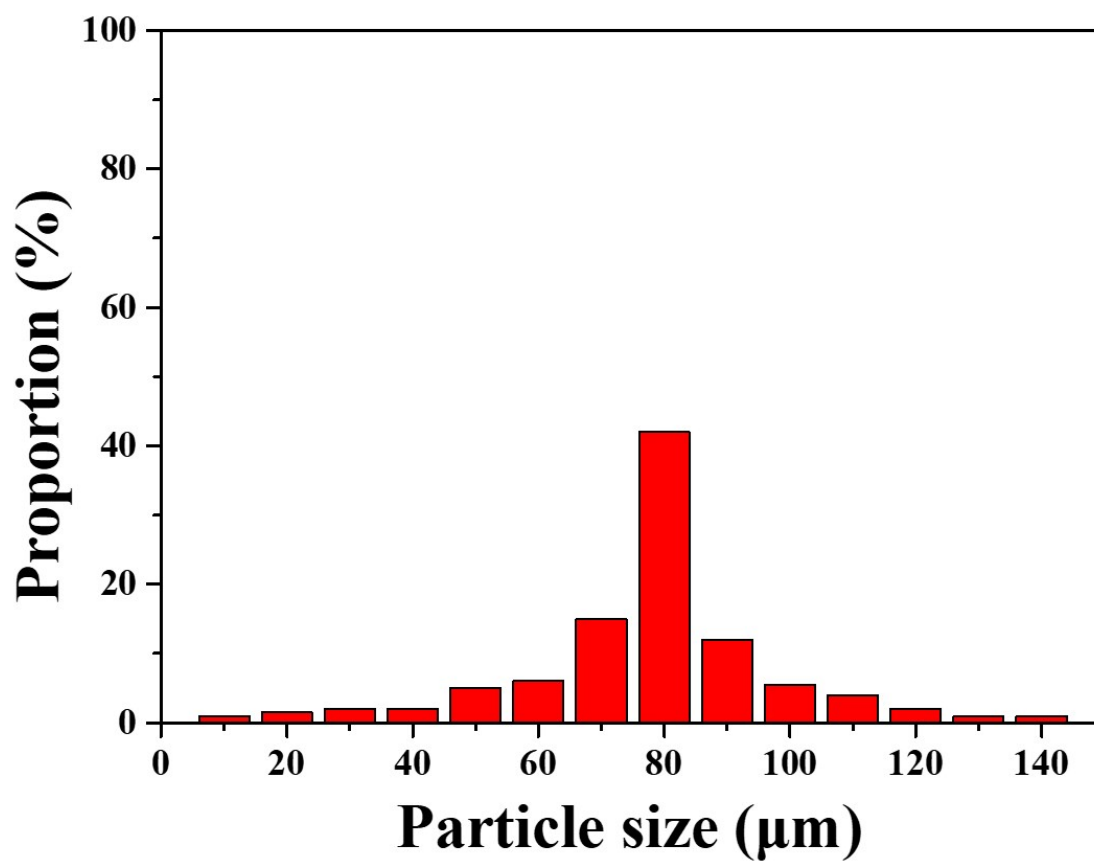

**Fig. S4** Particle size analysis chart of N-H-microcapsule

**Table S1.** Weight statistics of different elements of N-H-microcapsules and cracked N-H-microcapsule

|                          | Weight percent of elements (%) |       |       |       |
|--------------------------|--------------------------------|-------|-------|-------|
|                          | C                              | N     | O     | F     |
| N-H-microcapsule         | 26.67                          | 18.12 | 7.94  | 47.27 |
| Cracked N-H-microcapsule | 40.54                          | 36.20 | 14.17 | 9.09  |

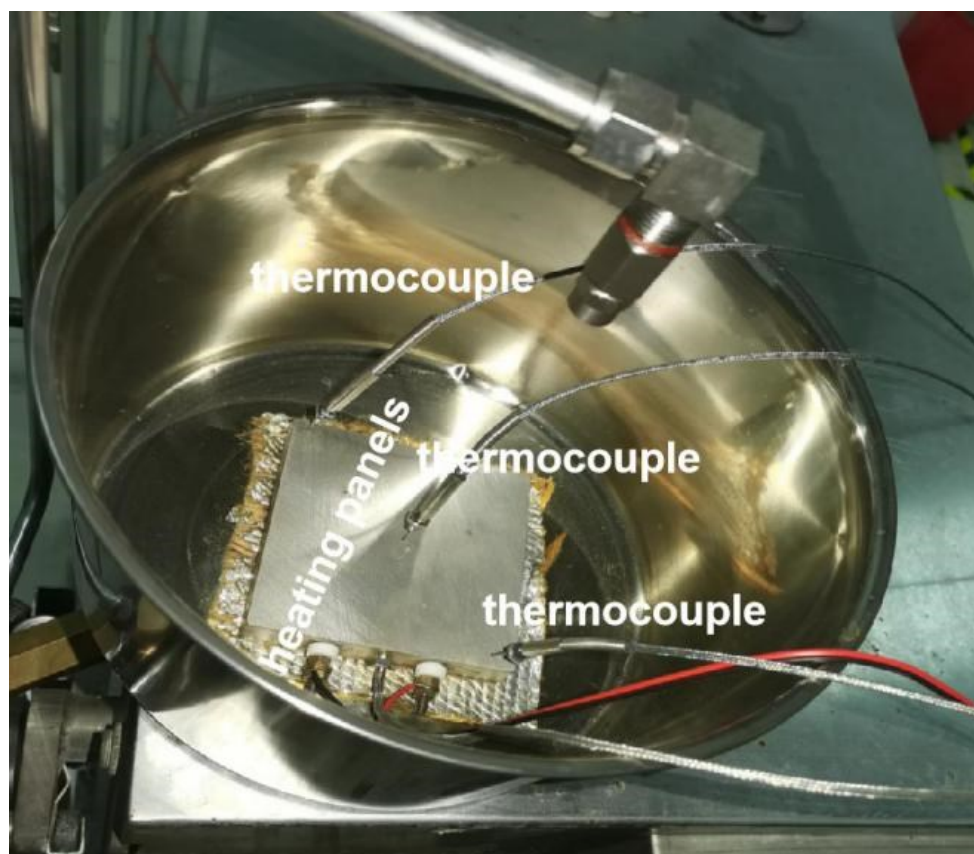

**Fig. S5** experimental model diagram of cooling by fire extinguishing agent heating plate

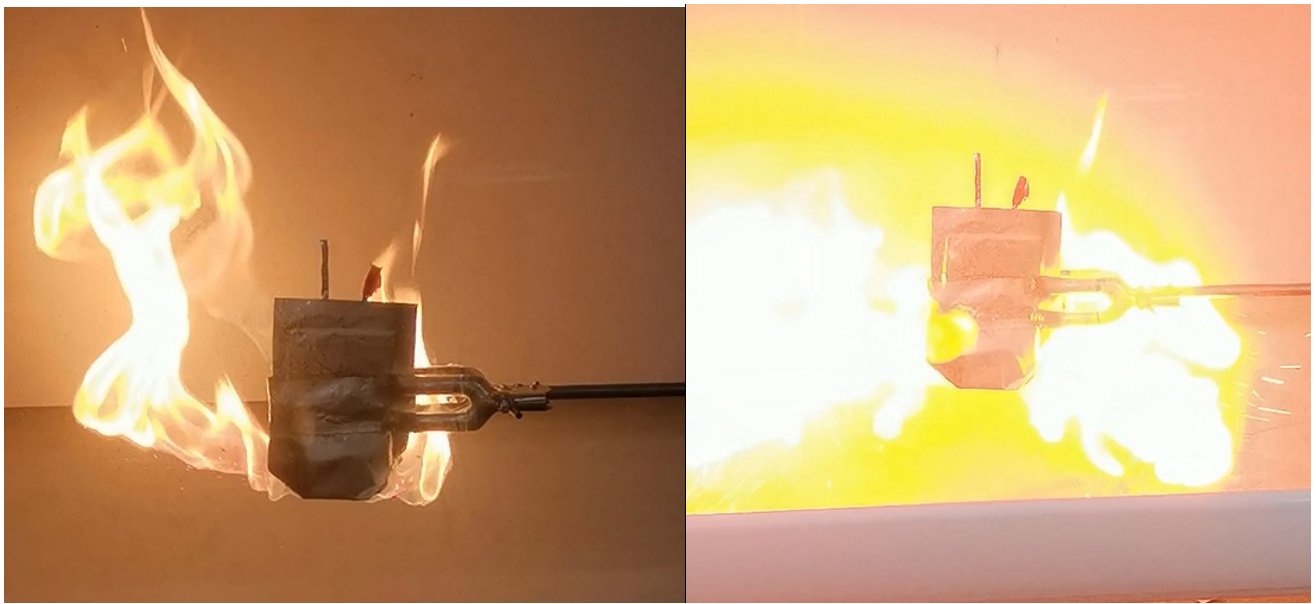

**Fig. S6** Action on pouch cell wrapped in outside of plastic film for NCM523 battery.
